# Supplementary material
Source: Springer Nature journal article supplement (https://www.springermedizin.de/resource/supplementary/12889_2010_3109_MOESM3_ESM.pdf/9488148)
Supplement: MOESM3 [file 9488148]

**Fig. 1.** *The four groups from which interviewees were selected.*

|                       | Large expansions | Moderate expansions |
|-----------------------|------------------|---------------------|
| High sickness absence | <b>I</b>         | <b>IV</b>           |
| Low sickness absence  | <b>II</b>        | <b>III</b>          |
